# Supplementary material for: Inactivation of SARS-CoV-2 through Treatment with the Mouth Rinsing Solutions ViruProX® and BacterX® Pro
Source: PubMed Central journal article supplement (PMC8002120; doi:10.3390/microorganisms9030521), 2021-03-03
Supplement: microorganisms-09-00521-s001.pdf [file microorganisms-09-00521-s001.pdf]

## Supplementary material

**Table S1**

| <b>Test solution</b>               | <b>Composition</b>                                                                                                                                                                                  | <b>Manufacturer</b>       | <b>Lot</b>                               | <b>Recommendation of the manufacturer</b>                       |
|------------------------------------|-----------------------------------------------------------------------------------------------------------------------------------------------------------------------------------------------------|---------------------------|------------------------------------------|-----------------------------------------------------------------|
| ViruProX®                          | Aqua, Propylene Glycol, PEG-40, Hydrogenated Castor Oil, Aroma, Hydrogen Peroxide (1.5%), Cetylpyridinium Chloride (0.05%), Sucralose, Erythritol, Sodium Saccharin                                 | Dr. Wittmann GmbH & Co KG | Lot.: 2005191                            | gargle and rinse with at least 10mL undiluted solution for 40 s |
| BacterX® pro                       | Aqua, Glycerol, Propylene Glycol, PEG-40, Hydrogenated Castor Oil, Sucralose, Chlorhexidine Digluconate (0.1%), Cetylpyridinium Chloride (0.05%), Xylite, Aroma, Sodium Fluoride (0.005%), CI 42051 | Dr. Wittmann GmbH & Co KG | Lot.: 2006221                            | rinse the mouth with undiluted solution for 20-30s              |
| 0.05% CPC                          |                                                                                                                                                                                                     | Dr. Wittmann GmbH & Co KG | Lot: K93839740945                        | Preparation Date: 14.07.2020                                    |
| 0.1% CHX                           |                                                                                                                                                                                                     | Dr. Wittmann GmbH & Co KG | Lot.: 3-8962-9-02-17,                    | Preparation Date: 14.07.2020                                    |
| 1.5% H <sub>2</sub> O <sub>2</sub> |                                                                                                                                                                                                     | Dr. Wittmann GmbH & Co KG | 1200203404, Preparation Date: 14.07.2020 |                                                                 |
